# Supplementary material for: Impact of Global Normalization in fMRI Acupuncture Studies
Source: Hindawi journal article supplement (doi:10.1155/2012/467061), 2012-01-01
Supplement: f1 [file 467061.f1.pdf]

## Supplementary Materials

### Results

The amplitudes of BOLD signal changes (ABSC) for PSGS and NO PSGS are listed in TableS4. Brain regions which are involved in the ‘stronger’ and ‘weaker’ activations of the conjunction analyses maps were tested. The table shows that after PSGS, the ABSCs of all of these regions were decreased. For each region, the ABSC evoked by acupuncture stimulation was slightly less than that evoked by tactile stimulation for both NO PSGS and PSGS. The ABSC in the ipsilateral direction was slightly less than that in the contralateral direction for both stimulations and for both NO PSGS and PSGS. The maximum for both stimulations was at the contralateral postcentral gyrus (BA40, 43), 0.37% for PSGS and 0.41% for NO PSGS in acupuncture and 0.49% for PSGS and 0.54% for NO PSGS in tactile stimulation.

### Figure Captions

**FigureS1.** Correlation between the reference vector (RV) and the global signal (GS) in the acupuncture run. Panel C indicates the GS-RV R-value of each subject. The two dashed lines represent the threshold of the R-values at  $p < 0.05$ , uncorrected. The other panels show the RV and GS of the representative subjects.

**FigureS2.** Correlation between the reference vector (RV) and the global signal (GS) in the tactile run. Panel C indicates the GS-RV R-value of each subject. The two dashed lines represent the threshold of the R-values at  $p < 0.05$ , uncorrected. The other panels show the RV

and GS of the representative subjects.

**FigureS3.** Changes in activations/deactivations between NO PSGS and PSGS. The map is based on the REM group results at  $p < 0.00001$ , uncorrected and  $p < 0.01$ , uncorrected respectively. Panel A shows the changes in the acupuncture run and Panel B shows those in the tactile run. For each panel, the meaning for each color is identical to that in Figure5 and Figure6.

**FigureS4.** Map of the REM group results in the acupuncture run and two sample  $t$ -test results between the acupuncture and tactile run for NO PSGS. Panel A indicates the REM group results evoked by acupuncture stimulation at  $p < 0.001$ , uncorrected with 5 contiguous voxels. Panel B shows the between group results of ‘acupuncture – tactile’ at  $p < 0.01$ , uncorrected with 5 contiguous voxels.

FigureS1

### Correlation of RV and GS in Acupuncture Run

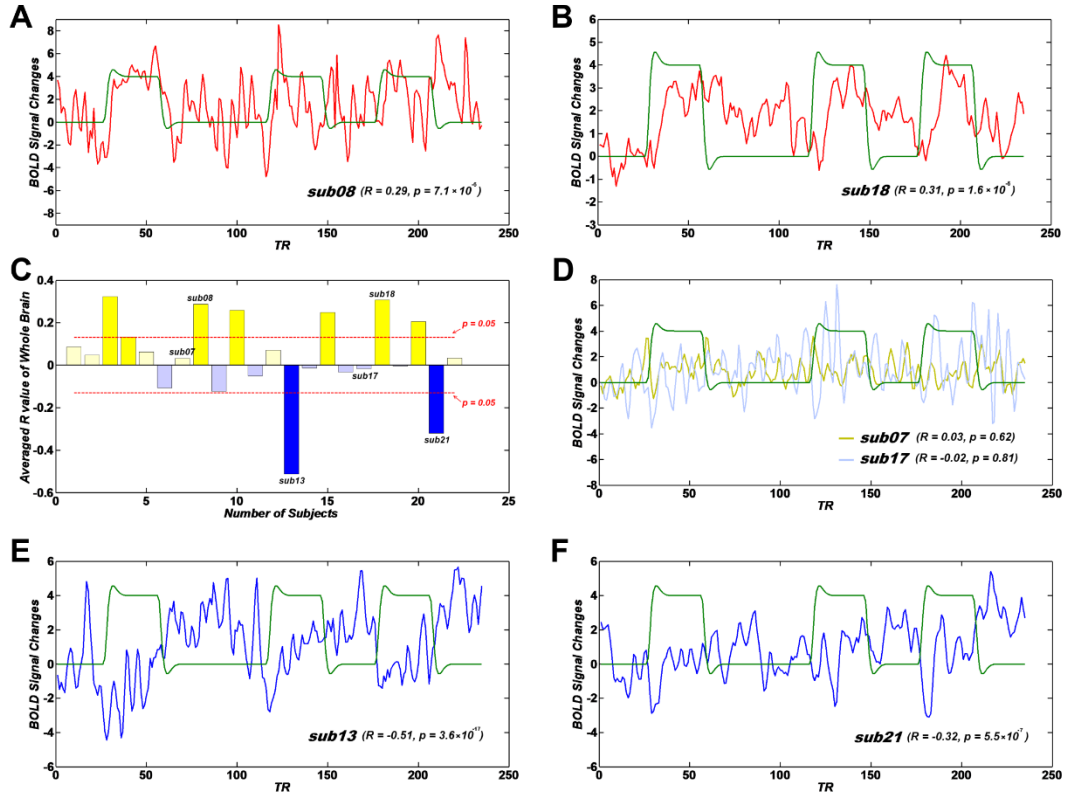

FigureS2

### Correlation of RV and GS in Tactile Run

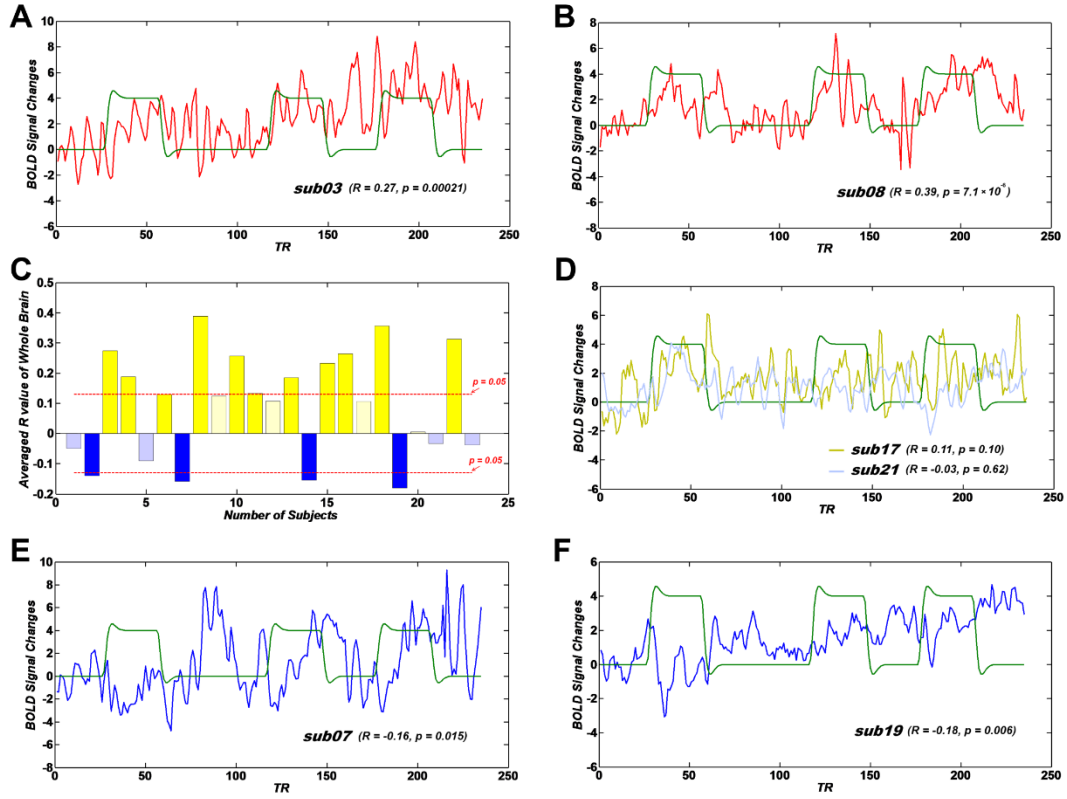

FigureS3

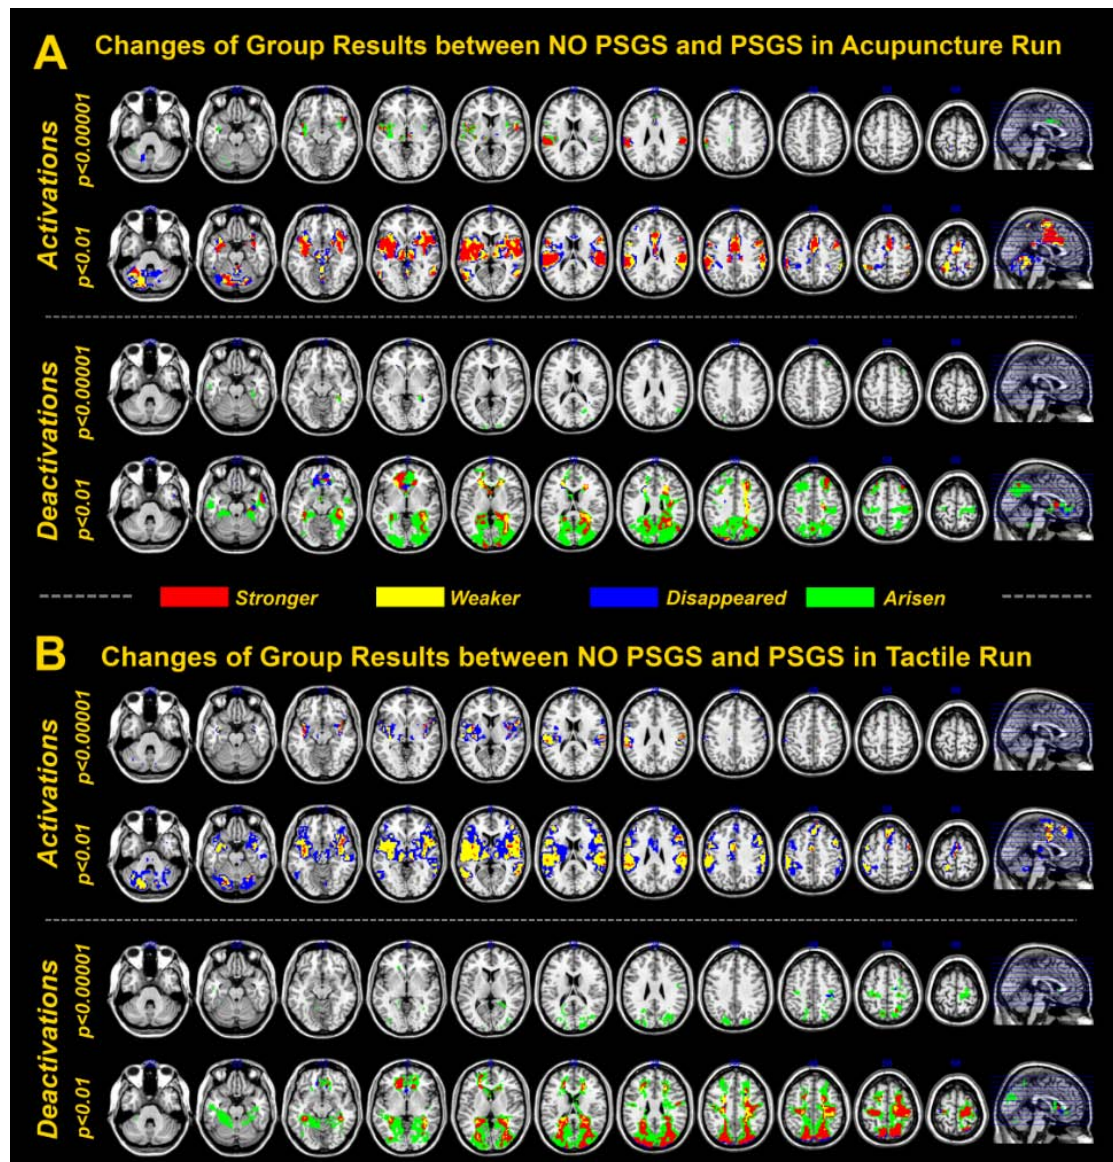

FigureS4

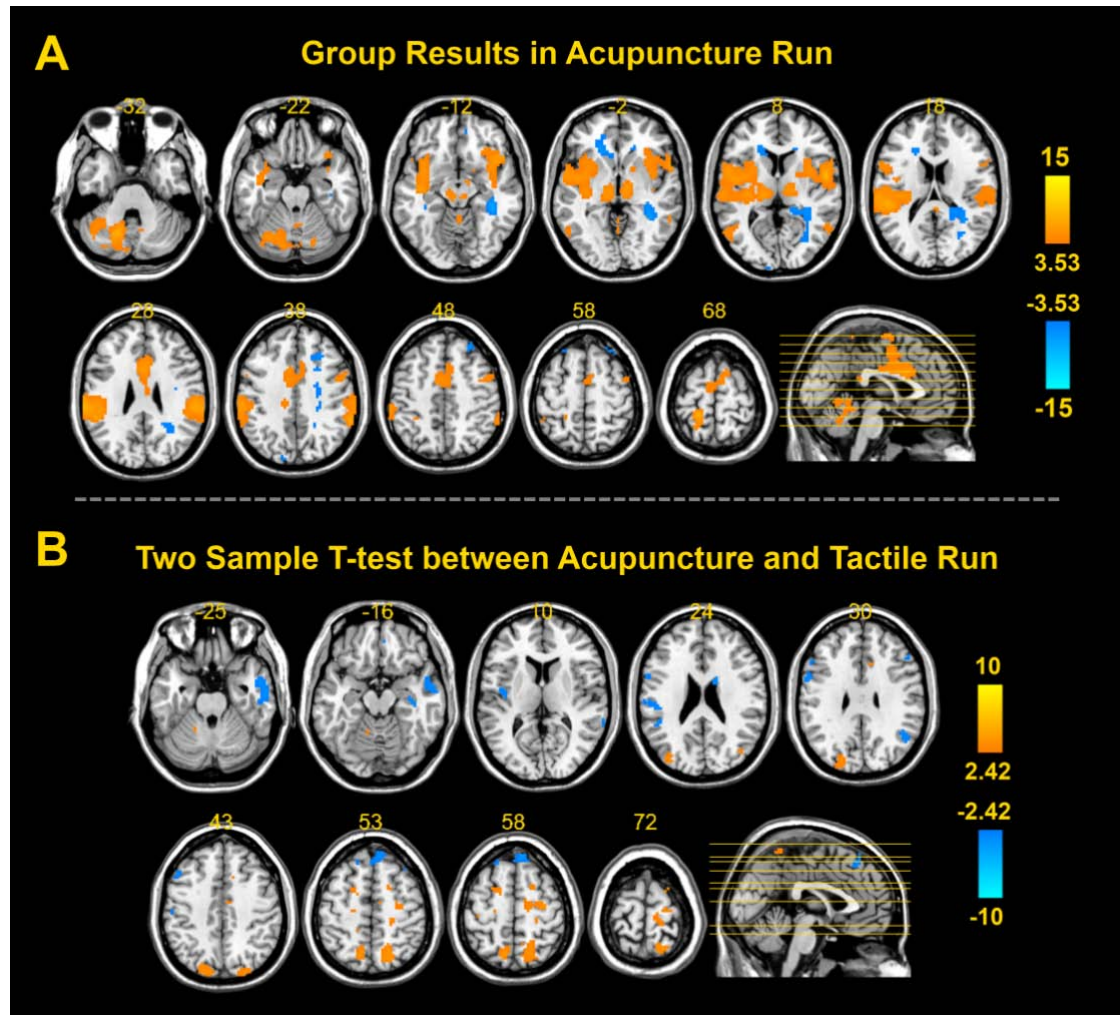

**Table S1. Comparison of Averaged R-value for NO PSGS and PSGS**

| <b>Acupuncture</b>   |                                   |        |                | <b>Tactile</b>       |                                   |        |                |
|----------------------|-----------------------------------|--------|----------------|----------------------|-----------------------------------|--------|----------------|
| Number of subjects   | Averaged R-value of Whole Brain   |        |                | Number of subjects   | Averaged R-value of Whole Brain   |        |                |
|                      | NO PSGS                           | PSGS   | PSGS - NO PSGS |                      | NO PSGS                           | PSGS   | PSGS - NO PSGS |
| <i>sub01</i>         | 0.062                             | 0.003  | -0.059         | <i>sub01</i>         | -0.035                            | 0.004  | <b>0.039</b>   |
| <i>sub02</i>         | 0.007                             | -0.021 | <b>-0.028</b>  | <i>sub02</i>         | -0.037                            | 0.037  | <b>0.074</b>   |
| <i>sub03</i>         | 0.165                             | -0.042 | <b>-0.207</b>  | <i>sub03</i>         | 0.098                             | -0.041 | <b>-0.139</b>  |
| <i>sub04</i>         | 0.072                             | -0.019 | <b>-0.091</b>  | <i>sub04</i>         | 0.056                             | -0.019 | <b>-0.075</b>  |
| <i>sub05</i>         | 0.036                             | -0.004 | <b>-0.04</b>   | <i>sub05</i>         | -0.033                            | 0.004  | <b>0.037</b>   |
| <i>sub06</i>         | -0.052                            | 0.015  | <b>0.067</b>   | <i>sub06</i>         | 0.042                             | -0.027 | <b>-0.069</b>  |
| <i>sub07</i>         | 0.024                             | 0.014  | -0.01          | <i>sub07</i>         | -0.067                            | 0.023  | <b>0.09</b>    |
| <i>sub08</i>         | 0.136                             | -0.021 | <b>-0.157</b>  | <i>sub08</i>         | 0.137                             | -0.043 | <b>-0.18</b>   |
| <i>sub09</i>         | -0.063                            | 0.013  | <b>0.076</b>   | <i>sub09</i>         | 0.024                             | -0.013 | <b>-0.037</b>  |
| <i>sub10</i>         | 0.083                             | -0.057 | <b>-0.14</b>   | <i>sub10</i>         | 0.107                             | -0.039 | <b>-0.146</b>  |
| <i>sub11</i>         | -0.022                            | 0.002  | <b>0.024</b>   | <i>sub11</i>         | 0.055                             | -0.009 | <b>-0.064</b>  |
| <i>sub12</i>         | 0.024                             | -0.003 | <b>-0.027</b>  | <i>sub12</i>         | 0.059                             | -0.015 | <b>-0.074</b>  |
| <i>sub13</i>         | -0.225                            | 0.050  | <b>0.275</b>   | <i>sub13</i>         | 0.096                             | -0.024 | <b>-0.12</b>   |
| <i>sub14</i>         | -0.014                            | -0.005 | 0.009          | <i>sub14</i>         | -0.075                            | 0.019  | <b>0.094</b>   |
| <i>sub15</i>         | 0.130                             | -0.015 | <b>-0.145</b>  | <i>sub15</i>         | 0.091                             | -0.013 | <b>-0.104</b>  |
| <i>sub16</i>         | -0.008                            | 0.001  | <b>0.009</b>   | <i>sub16</i>         | 0.105                             | -0.028 | <b>-0.133</b>  |
| <i>sub17</i>         | -0.009                            | -0.004 | 0.005          | <i>sub17</i>         | 0.044                             | -0.009 | <b>-0.053</b>  |
| <i>sub18</i>         | 0.085                             | -0.037 | <b>-0.122</b>  | <i>sub18</i>         | 0.148                             | -0.045 | <b>-0.193</b>  |
| <i>sub19</i>         | -0.010                            | 0.005  | <b>0.015</b>   | <i>sub19</i>         | -0.046                            | 0.027  | <b>0.073</b>   |
| <i>sub20</i>         | 0.089                             | -0.012 | <b>-0.101</b>  | <i>sub20</i>         | -0.013                            | -0.007 | 0.006          |
| <i>sub21</i>         | -0.139                            | 0.019  | <b>0.158</b>   | <i>sub21</i>         | -0.03                             | -0.014 | 0.016          |
| <i>sub22</i>         | 0.016                             | 0.000  | -0.016         | <i>sub22</i>         | 0.132                             | -0.024 | <b>-0.156</b>  |
| <i>sub23</i>         |                                   |        |                | <i>sub23</i>         | -0.019                            | 0.000  | <b>0.019</b>   |
| <i>mean</i>          | 0.018                             | -0.005 | <b>-0.023</b>  | <i>mean</i>          | 0.036                             | -0.011 | <b>-0.048</b>  |
| <i>Paired t-test</i> | <b>p = 2.3301e-005 (t = 5.11)</b> |        |                | <i>Paired t-test</i> | <b>p = 3.5567e-008 (t = 7.91)</b> |        |                |

Averaged R-value for the whole brain whose sign is reversed in PSGS as shown in bold. Before the paired t-test values of both NO PSGS and PSGS of a subject are reversed if the value of NO PSGS is negative.



**Table S2. Comparison of Number of Activation/Deactivation for NO PSGS and PSGS**

| Acupuncture      |                     |             |              |                       |             |              | Tactile          |                     |             |             |                       |             |               |
|------------------|---------------------|-------------|--------------|-----------------------|-------------|--------------|------------------|---------------------|-------------|-------------|-----------------------|-------------|---------------|
| Subjects<br>Num. | Num. of Activations |             |              | Num. of Deactivations |             |              | Subjects<br>Num. | Num. of Activations |             |             | Num. of Deactivations |             |               |
|                  | NO PSGS             | PSGS        | △            | NO PSGS               | PSGS        | △            |                  | NO PSGS             | PSGS        | △           | NO PSGS               | PSGS        | △             |
| <i>sub01</i>     | 16536               | 12100       | -27%         | 8035                  | 8770        | 9%           | <i>sub01</i>     | 1794                | 5805        | <b>224%</b> | 14946                 | 5734        | <b>-62%</b>   |
| <i>sub02</i>     | 12815               | 9933        | -22%         | 12060                 | 18089       | 50%          | <i>sub02</i>     | 5027                | 18583       | <b>270%</b> | 12249                 | 6000        | <b>-51%</b>   |
| <i>sub03</i>     | 31146               | 5757        | <b>-82%</b>  | 321                   | 17782       | <b>5440%</b> | <i>sub03</i>     | 16674               | 8097        | <b>-51%</b> | 2407                  | 14404       | <b>498%</b>   |
| <i>sub04</i>     | 7524                | 5782        | -23%         | 482                   | 2969        | <b>516%</b>  | <i>sub04</i>     | 13195               | 7919        | -40%        | 3742                  | 12075       | <b>223%</b>   |
| <i>sub05</i>     | 11223               | 4662        | <b>-58%</b>  | 694                   | 8781        | <b>1165%</b> | <i>sub05</i>     | 3531                | 5520        | 56%         | 7414                  | 4621        | -38%          |
| <i>sub06</i>     | 64                  | 4211        | <b>6480%</b> | 7256                  | 1538        | <b>-79%</b>  | <i>sub06</i>     | 9142                | 6419        | -30%        | 5964                  | 11258       | 89%           |
| <i>sub07</i>     | 7093                | 5237        | -26%         | 2910                  | 2658        | -9%          | <i>sub07</i>     | 4410                | 9928        | <b>125%</b> | 11910                 | 7748        | -35%          |
| <i>sub08</i>     | 26323               | 8132        | <b>-69%</b>  | 754                   | 14987       | <b>1888%</b> | <i>sub08</i>     | 27111               | 8718        | <b>-68%</b> | 1358                  | 22964       | <b>1591%</b>  |
| <i>sub09</i>     | 3060                | 5635        | 84%          | 5238                  | 2931        | -44%         | <i>sub09</i>     | 15444               | 10906       | -29%        | 8740                  | 14718       | 68%           |
| <i>sub10</i>     | 25675               | 8277        | <b>-68%</b>  | 6175                  | 22172       | <b>259%</b>  | <i>sub10</i>     | 15665               | 4847        | <b>-69%</b> | 236                   | 12608       | <b>5242%</b>  |
| <i>sub11</i>     | 8319                | 5344        | -36%         | 5983                  | 9332        | 56%          | <i>sub11</i>     | 13989               | 10695       | -24%        | 8924                  | 12023       | 35%           |
| <i>sub12</i>     | 14318               | 14503       | 1%           | 7748                  | 11688       | 51%          | <i>sub12</i>     | 10080               | 5443        | -46%        | 636                   | 7129        | <b>1021%</b>  |
| <i>sub13</i>     | 769                 | 20781       | <b>2602%</b> | 34899                 | 8052        | <b>-77%</b>  | <i>sub13</i>     | 5509                | 2601        | <b>-53%</b> | 166                   | 2075        | <b>1150%</b>  |
| <i>sub14</i>     | 2223                | 4198        | 89%          | 790                   | 2154        | <b>173%</b>  | <i>sub14</i>     | 2696                | 7674        | <b>185%</b> | 13499                 | 6516        | <b>-52%</b>   |
| <i>sub15</i>     | 24058               | 8418        | <b>-65%</b>  | 1846                  | 8343        | <b>352%</b>  | <i>sub15</i>     | 14785               | 4528        | <b>-69%</b> | 609                   | 4318        | <b>609%</b>   |
| <i>sub16</i>     | 2319                | 3216        | 39%          | 6669                  | 4370        | -34%         | <i>sub16</i>     | 24116               | 7481        | <b>-69%</b> | 2581                  | 16091       | <b>523%</b>   |
| <i>sub17</i>     | 7455                | 5041        | -32%         | 2287                  | 6715        | <b>194%</b>  | <i>sub17</i>     | 9415                | 4423        | <b>-53%</b> | 1996                  | 5881        | <b>195%</b>   |
| <i>sub18</i>     | 17271               | 6221        | <b>-64%</b>  | 2026                  | 12740       | <b>529%</b>  | <i>sub18</i>     | 32003               | 6136        | <b>-81%</b> | 185                   | 19206       | <b>10282%</b> |
| <i>sub19</i>     | 6687                | 10596       | 58%          | 14237                 | 9681        | -32%         | <i>sub19</i>     | 7321                | 16711       | <b>128%</b> | 18580                 | 7451        | <b>-60%</b>   |
| <i>sub20</i>     | 19808               | 7895        | <b>-60%</b>  | 2740                  | 9533        | <b>248%</b>  | <i>sub20</i>     | 2334                | 5454        | <b>134%</b> | 6028                  | 5589        | -7%           |
| <i>sub21</i>     | 1953                | 6912        | <b>254%</b>  | 21059                 | 4313        | <b>-80%</b>  | <i>sub21</i>     | 7685                | 6496        | -15%        | 8057                  | 9275        | 15%           |
| <i>sub22</i>     | 5150                | 3265        | -37%         | 636                   | 1853        | <b>191%</b>  | <i>sub22</i>     | 20326               | 10068       | <b>-50%</b> | 4847                  | 15963       | <b>229%</b>   |
| <i>sub23</i>     |                     |             |              |                       |             |              | <i>sub23</i>     | 3989                | 4879        | 22%         | 5700                  | 5006        | -12%          |
| <b>Mean</b>      | <b>11445</b>        | <b>7551</b> | <b>-34%</b>  | <b>6584</b>           | <b>8611</b> | <b>31%</b>   | <b>Mean</b>      | <b>11576</b>        | <b>7797</b> | <b>-33%</b> | <b>6121</b>           | <b>9941</b> | <b>66%</b>    |

The activations and deactivations are thresholded at  $p < 0.01$ , uncorrected.  $\Delta > 100\%$  are shown in bold and colored in red (activations) or light blue (deactivations).  $\Delta < -50\%$  are shown in bold and colored in orange (activations) or green (deactivations).  $\Delta = (\text{PSGS} - \text{NO PSGS}) / \text{NO PSGS} * 100\%$ .



**Table S3. Comparison of Ratio of Activation/Deactivation for NO PSGS and PSGS**

| <b>Acupuncture</b> |                |                |                |              |                |                | <b>Tactile</b>   |                |             |                |                |              |                |
|--------------------|----------------|----------------|----------------|--------------|----------------|----------------|------------------|----------------|-------------|----------------|----------------|--------------|----------------|
| <b>Subjects</b>    | <b>NO PSGS</b> |                |                | <b>PSGS</b>  |                |                | <b>Subjects</b>  | <b>NO PSGS</b> |             |                | <b>PSGS</b>    |              |                |
|                    | <b>Num.</b>    | <b>Ac Num.</b> | <b>De Num.</b> | <b>Ratio</b> | <b>Ac Num.</b> | <b>De Num.</b> |                  | <b>Ratio</b>   | <b>Num.</b> | <b>Ac Num.</b> | <b>De Num.</b> | <b>Ratio</b> | <b>Ac Num.</b> |
| <i>sub01</i>       | 5955           | 2418           | 246%           | 3859         | 2258           | 171%           | <i>sub01</i>     | 137            | 1858        | 7%             | 493            | 776          | 64%            |
| <i>sub02</i>       | 5331           | 1224           | 436%           | 4335         | 3183           | 136%           | <i>sub02</i>     | 1011           | 3763        | 27%            | 4591           | 2024         | 227%           |
| <i>sub03</i>       | 8858           | 23             | 38513%         | 1681         | 7094           | 24%            | <i>sub03</i>     | 5458           | 119         | 4587%          | 2861           | 2089         | 137%           |
| <i>sub04</i>       | 2067           | 8              | 25838%         | 2056         | 48             | 4283%          | <i>sub04</i>     | 4598           | 122         | 3769%          | 2929           | 1269         | 231%           |
| <i>sub05</i>       | 1514           | 15             | 10093%         | 882          | 516            | 171%           | <i>sub05</i>     | 669            | 391         | 171%           | 1160           | 285          | 407%           |
| <i>sub06</i>       | 1              | 407            | 0.25%          | 31           | 112            | 28%            | <i>sub06</i>     | 3028           | 634         | 478%           | 2299           | 1480         | 155%           |
| <i>sub07</i>       | 429            | 933            | 46%            | 426          | 666            | 64%            | <i>sub07</i>     | 556            | 2005        | 28%            | 1506           | 1964         | 77%            |
| <i>sub08</i>       | 8109           | 18             | 45050%         | 2422         | 2430           | 100%           | <i>sub08</i>     | 10999          | 49          | 22447%         | 3706           | 10182        | 36%            |
| <i>sub09</i>       | 640            | 61             | 1049%          | 1017         | 71             | 1432%          | <i>sub09</i>     | 7024           | 2556        | 275%           | 5328           | 5031         | 106%           |
| <i>sub10</i>       | 9388           | 3095           | 303%           | 3007         | 9423           | 32%            | <i>sub10</i>     | 2294           | 1           | 229400%        | 917            | 527          | 174%           |
| <i>sub11</i>       | 1588           | 447            | 355%           | 1191         | 924            | 129%           | <i>sub11</i>     | 5969           | 2746        | 217%           | 5084           | 4033         | 126%           |
| <i>sub12</i>       | 3866           | 2090           | 185%           | 5659         | 3682           | 154%           | <i>sub12</i>     | 1854           | 11          | 16855%         | 1528           | 462          | 331%           |
| <i>sub13</i>       | 39             | 13037          | 0.30%          | 6694         | 2450           | 273%           | <i>sub13</i>     | 546            | 19          | 2874%          | 499            | 75           | 665%           |
| <i>sub14</i>       | 228            | 7              | 3257%          | 896          | 20             | 4480%          | <i>sub14</i>     | 151            | 2027        | 7%             | 1306           | 1446         | 90%            |
| <i>sub15</i>       | 5261           | 381            | 1381%          | 1849         | 1260           | 147%           | <i>sub15</i>     | 2200           | 26          | 8462%          | 685            | 164          | 418%           |
| <i>sub16</i>       | 278            | 583            | 48%            | 358          | 441            | 81%            | <i>sub16</i>     | 9497           | 813         | 1168%          | 3009           | 3679         | 82%            |
| <i>sub17</i>       | 1043           | 138            | 756%           | 693          | 574            | 121%           | <i>sub17</i>     | 1562           | 268         | 583%           | 908            | 674          | 135%           |
| <i>sub18</i>       | 5043           | 552            | 914%           | 1906         | 1863           | 102%           | <i>sub18</i>     | 9705           | 0           | Inf            | 1959           | 5181         | 38%            |
| <i>sub19</i>       | 1556           | 6238           | 25%            | 2972         | 4362           | 68%            | <i>sub19</i>     | 2072           | 7039        | 29%            | 4972           | 2554         | 195%           |
| <i>sub20</i>       | 6001           | 684            | 877%           | 2295         | 1831           | 125%           | <i>sub20</i>     | 116            | 227         | 51%            | 849            | 308          | 276%           |
| <i>sub21</i>       | 360            | 2715           | 13%            | 1157         | 580            | 199%           | <i>sub21</i>     | 1975           | 530         | 373%           | 1787           | 797          | 224%           |
| <i>sub22</i>       | 570            | 1              | 57000%         | 480          | 6              | 8000%          | <i>sub22</i>     | 8714           | 1112        | 784%           | 4877           | 3986         | 122%           |
| <i>Mean</i>        | <b>3097</b>    | <b>1594</b>    | <b>194%</b>    | <b>2085</b>  | <b>1991</b>    | <b>105%</b>    | <i>sub23</i>     | 1039           | 1052        | 99%            | 1478           | 1183         | 125%           |
| <i>Mean_0.01</i>   | <b>11445</b>   | <b>6584</b>    | <b>174%</b>    | <b>7551</b>  | <b>8611</b>    | <b>88%</b>     | <i>Mean</i>      | <b>3529</b>    | <b>1190</b> | <b>297%</b>    | <b>2380</b>    | <b>2181</b>  | <b>109%</b>    |
|                    |                |                |                |              |                |                | <i>Mean_0.01</i> | <b>11576</b>   | <b>6121</b> | <b>189%</b>    | <b>7797</b>    | <b>9941</b>  | <b>78%</b>     |

|              |                   |              |             |              |             |              |             |              |                   |              |             |              |             |              |            |
|--------------|-------------------|--------------|-------------|--------------|-------------|--------------|-------------|--------------|-------------------|--------------|-------------|--------------|-------------|--------------|------------|
| <i>Group</i> | <i>p</i> <0.00001 | <b>850</b>   | <b>59</b>   | <b>1441%</b> | <b>1350</b> | <b>245</b>   | <b>551%</b> | <i>Group</i> | <i>p</i> <0.00001 | <b>2231</b>  | <b>87</b>   | <b>2564%</b> | <b>902</b>  | <b>1486</b>  | <b>61%</b> |
|              | <i>p</i> <0.001   | <b>5831</b>  | <b>821</b>  | <b>710%</b>  | <b>4680</b> | <b>4722</b>  | <b>99%</b>  |              | <i>p</i> <0.001   | <b>8505</b>  | <b>2252</b> | <b>378%</b>  | <b>3509</b> | <b>7520</b>  | <b>47%</b> |
|              | <i>P</i> <0.01    | <b>21067</b> | <b>3521</b> | <b>598%</b>  | <b>7953</b> | <b>11687</b> | <b>68%</b>  |              | <i>P</i> <0.01    | <b>14955</b> | <b>6098</b> | <b>245%</b>  | <b>6401</b> | <b>14016</b> | <b>46%</b> |

The activations and deactivations are thresholded at  $p < 0.00001$ , uncorrected. The mean value across subjects and the value at the group level are shown in bold. Mean\_0.01 represents the mean value across subjects at  $p < 0.01$ , uncorrected. Ratio = Ac Num./De Num.\*100%. Abbreviations: Ac-activations; De-deactivations

**TableS4. Amplitude of BOLD signal changes between NO PSGS  
and PSGS**

| Regions                  |   | Acupuncture |           |      | Tactile   |           |      |
|--------------------------|---|-------------|-----------|------|-----------|-----------|------|
|                          |   | NO PSGS     | PSGS      | Size | NO PSGS   | PSGS      | Size |
| Brainstem                |   |             |           |      |           |           |      |
| Midbrain                 | L | 0.15±0.02   | 0.11±0.02 | 60   | 0.16±0.02 | 0.11±0.03 | 45   |
|                          | R | 0.17±0.02   | 0.13±0.02 | 36   | 0.12±0.02 | 0.06±0.02 | 12   |
| Inferior Frontal Gyrus   |   |             |           |      |           |           |      |
| BA9, 13, 44, 45, 47      | L | 0.22±0.05   | 0.18±0.05 | 39   | 0.33±0.07 | 0.28±0.09 | 29   |
|                          | R | 0.24±0.09   | 0.20±0.09 | 54   | 0.24±0.07 | 0.19±0.08 | 54   |
| Medial Frontal Gyrus     |   |             |           |      |           |           |      |
| BA6, 8, 32               | L | 0.19±0.04   | 0.15±0.04 | 11   | 0.28±0.09 | 0.24±0.09 | 7    |
|                          | R | 0.21±0.05   | 0.17±0.05 | 35   | 0.28±0.08 | 0.23±0.09 | 16   |
| Middle Frontal Gyrus     |   |             |           |      |           |           |      |
| BA6, 8, 9                | L |             |           |      |           |           |      |
|                          | R | 0.26±0.05   | 0.22±0.05 | 28   | 0.24±0.05 | 0.19±0.06 | 28   |
| Superior Frontal Gyrus   |   |             |           |      |           |           |      |
| BA6                      | L | 0.19±0.02   | 0.15±0.02 | 5    | 0.18±0.01 | 0.12±0.02 | 8    |
|                          | R | 0.21±0.04   | 0.17±0.04 | 22   | 0.21±0.04 | 0.16±0.05 | 25   |
| Precentral Gyrus         |   |             |           |      |           |           |      |
| BA4, 6, 43, 44           | L | 0.25±0.08   | 0.21±0.08 | 40   | 0.35±0.11 | 0.30±0.12 | 60   |
|                          | R | 0.22±0.04   | 0.18±0.04 | 45   | 0.25±0.06 | 0.20±0.07 | 47   |
| Anterior Cingulate       |   |             |           |      |           |           |      |
| BA24                     | L | 0.20±0.03   | 0.15±0.03 | 8    |           |           |      |
|                          | R | 0.17±0.03   | 0.13±0.03 | 6    |           |           |      |
| Cingulate Gyrus          |   |             |           |      |           |           |      |
| BA24, 32                 | L | 0.20±0.05   | 0.16±0.05 | 79   | 0.21±0.02 | 0.16±0.03 | 23   |
|                          | R | 0.21±0.05   | 0.17±0.05 | 53   |           |           |      |
| Postcentral Gyrus        |   |             |           |      |           |           |      |
| BA1, 2, 3                | L | 0.30±0.09   | 0.26±0.09 | 50   | 0.40±0.12 | 0.34±0.12 | 60   |
|                          | R | 0.33±0.07   | 0.29±0.07 | 36   | 0.36±0.09 | 0.30±0.09 | 36   |
| BA5, 7                   | L | 0.18±0.02   | 0.14±0.02 | 9    |           |           |      |
|                          | R |             |           |      |           |           |      |
| BA40, 43                 | L | 0.41±0.11   | 0.37±0.11 | 29   | 0.54±0.15 | 0.49±0.15 | 31   |
|                          | R | 0.30±0.06   | 0.26±0.06 | 23   | 0.37±0.07 | 0.31±0.08 | 29   |
| Inferior Parietal Lobule |   |             |           |      |           |           |      |
| BA40                     | L | 0.29±0.09   | 0.25±0.09 | 96   | 0.34±0.10 | 0.29±0.11 | 100  |
|                          | R | 0.32±0.09   | 0.28±0.09 | 84   | 0.37±0.08 | 0.32±0.08 | 56   |
| Supramarginal Gyrus      |   |             |           |      |           |           |      |
| BA40                     | L | 0.23±0.02   | 0.19±0.02 | 7    | 0.24±0.06 | 0.19±0.08 | 5    |
|                          | R | 0.25±0.04   | 0.21±0.04 | 13   |           |           |      |
| Thalamus                 |   |             |           |      |           |           |      |
|                          | L | 0.17±0.04   | 0.13±0.04 | 98   | 0.19±0.04 | 0.13±0.05 | 63   |

|                           |   |           |           |     |           |           |     |
|---------------------------|---|-----------|-----------|-----|-----------|-----------|-----|
|                           | R | 0.18±0.04 | 0.14±0.04 | 75  | 0.15±0.04 | 0.09±0.04 | 30  |
| Insula                    |   |           |           |     |           |           |     |
| BA13                      | L | 0.22±0.07 | 0.17±0.07 | 141 | 0.28±0.08 | 0.23±0.08 | 117 |
|                           | R | 0.19±0.03 | 0.15±0.03 | 73  | 0.21±0.05 | 0.16±0.05 | 82  |
| Lentiform Nucleus         |   |           |           |     |           |           |     |
|                           | L | 0.14±0.02 | 0.10±0.02 | 94  | 0.13±0.01 | 0.08±0.01 | 86  |
|                           | R | 0.13±0.02 | 0.09±0.02 | 14  | 0.12±0.01 | 0.07±0.01 | 21  |
| Caudate                   |   |           |           |     |           |           |     |
|                           | L | 0.18±0.02 | 0.14±0.12 | 40  | 0.21±0.03 | 0.15±0.04 | 32  |
|                           | R | 0.16±0.03 | 0.12±0.03 | 8   | 0.14±0.01 | 0.08±0.01 | 13  |
| Extra-Nuclear             |   |           |           |     |           |           |     |
| BA13                      | L | 0.25±0.02 | 0.21±0.02 | 6   |           |           |     |
|                           | R | 0.21±0.03 | 0.17±0.03 | 9   | 0.23±0.03 | 0.19±0.04 | 6   |
| Sub-Gyral                 |   |           |           |     |           |           |     |
| BA21                      | L | 0.24±0.03 | 0.20±0.03 | 11  | 0.24±0.03 | 0.19±0.03 | 10  |
|                           | R | 0.16±0.01 | 0.12±0.01 | 5   | 0.19±0.01 | 0.13±0.01 | 6   |
| Middle Temporal Gyrus     |   |           |           |     |           |           |     |
| BA21, 37, 39              | L | 0.20±0.02 | 0.16±0.02 | 10  |           |           |     |
|                           | R | 0.24±0.03 | 0.20±0.03 | 11  | 0.33±0.04 | 0.29±0.06 | 11  |
| Superior Temporal Gyrus   |   |           |           |     |           |           |     |
| BA22, 38, 41, 42          | L | 0.27±0.10 | 0.23±0.10 | 121 | 0.38±0.14 | 0.32±0.14 | 89  |
|                           | R | 0.28±0.07 | 0.24±0.07 | 53  | 0.31±0.10 | 0.26±0.11 | 72  |
| Transverse Temporal Gyrus |   |           |           |     |           |           |     |
| BA41, 42                  | L | 0.29±0.08 | 0.25±0.08 | 24  | 0.39±0.12 | 0.37±0.15 | 20  |
|                           | R | 0.29±0.07 | 0.25±0.07 | 7   | 0.33±0.07 | 0.27±0.07 | 10  |
| Cerebellum                |   |           |           |     |           |           |     |
| Culmen                    | L | 0.17±0.03 | 0.13±0.03 | 49  |           |           |     |
|                           | R | 0.14±0.01 | 0.10±0.01 | 5   |           |           |     |
| Declive                   | L | 0.19±0.04 | 0.15±0.04 | 190 | 0.19±0.03 | 0.13±0.04 | 90  |
|                           | R | 0.13±0.02 | 0.09±0.02 | 18  | 0.20±0.03 | 0.16±0.04 | 33  |
| Pyramis                   | L | 0.18±0.01 | 0.14±0.01 | 25  | 0.19±0.03 | 0.13±0.03 | 14  |
|                           | R |           |           |     |           |           |     |
| Tuber                     | L | 0.17±0.02 | 0.13±0.02 | 5   | 0.24±0.03 | 0.19±0.03 | 9   |
| Uvula                     | L | 0.17±0.01 | 0.13±0.01 | 18  | 0.17±0.03 | 0.11±0.03 | 30  |
|                           | R |           |           |     |           |           |     |

The amplitude of BOLD signal changes of regions that belong to the 'stronger' and 'weaker' regions in Figure5 for NO PSGS and PSGS is listed.

Abbreviations: BA-Brodmann area; L-left; R-right.
